# Supplementary material
Source: Springer Nature journal article supplement (https://www.springermedizin.de/resource/supplementary/13058_2011_2886_MOESM5_ESM.pdf/9702806)

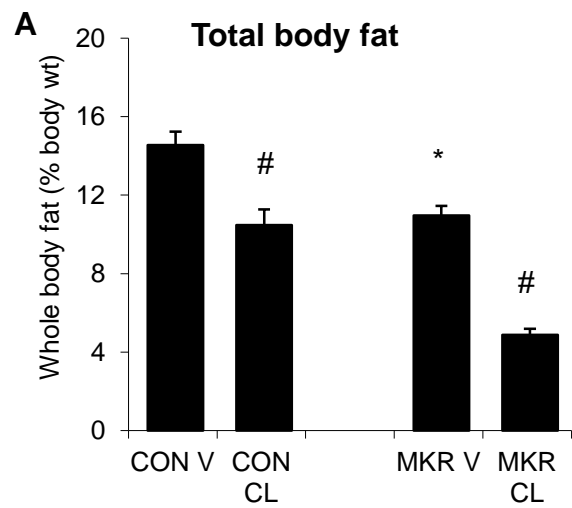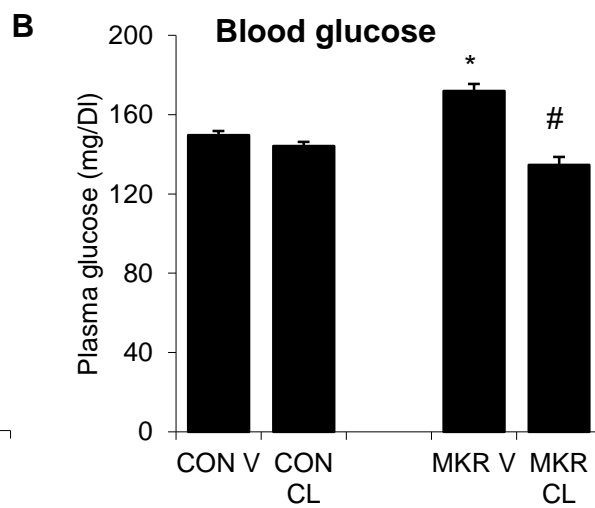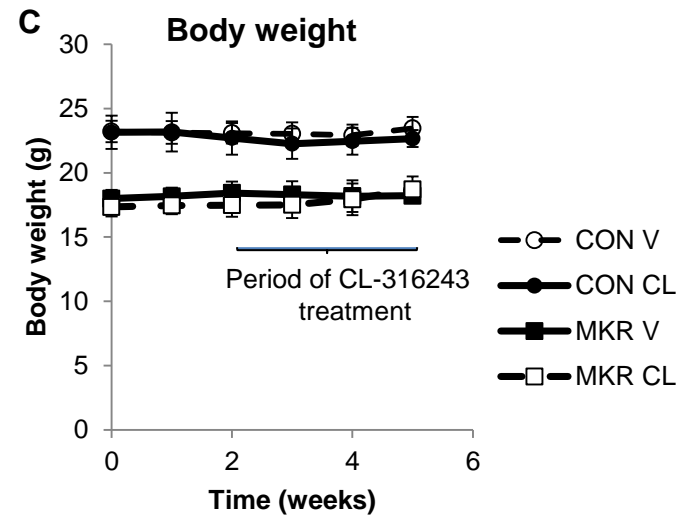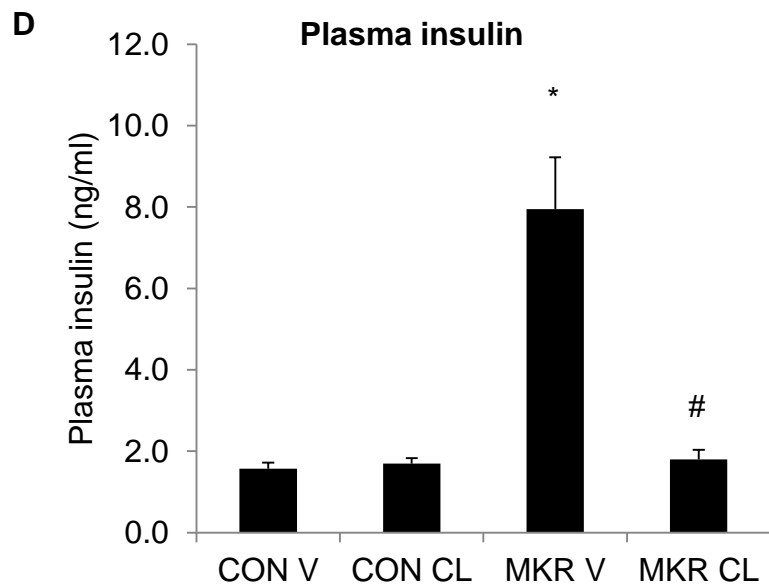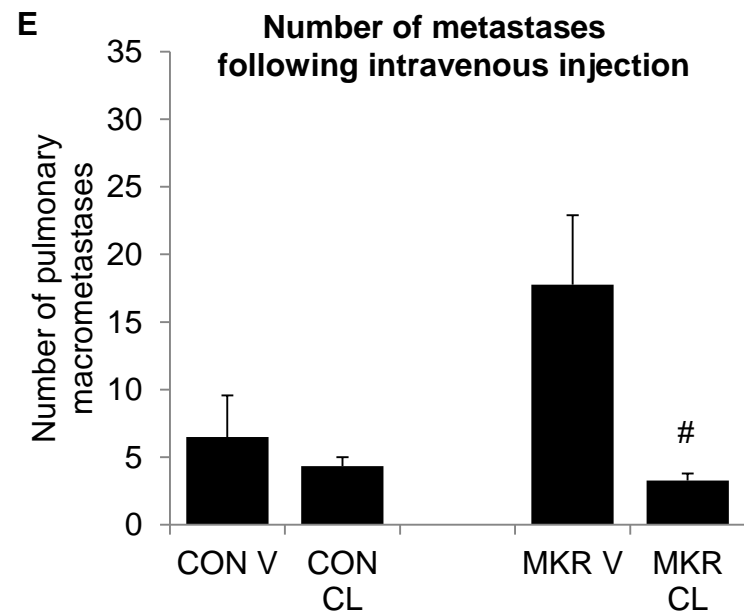

Supplement: MOESM5 [file 9702806]
